# Supplementary material for: Facile construction of a hierarchical Bi@BiOBr–Bi2MoO6 ternary heterojunction with abundant oxygen vacancies for excellent photocatalytic nitrogen fixation
Source: Royal Society of Chemistry journal article supplement (doi:10.1039/d1se00178g), 2021-01-01
Supplement: d1se00178g1.pdf [file d1se00178g1.pdf]

**Facile construction of hierarchical Bi@BiOBr-Bi<sub>2</sub>MoO<sub>6</sub> ternary heterojunction with abundant oxygen vacancies for excellent photocatalytic nitrogen fixation**

Meng Lan, Nan Zheng\*, Xiaoli Dong\*, Xiaolei Ren, Jiaxin Wu, Hongchao Ma,  
Xiufang Zhang <sup>[a]</sup>

School of Light Industry and Chemical Engineering, Dalian Polytechnic University,  
#1 Qinggongyuan, Dalian 116034, P R China

\*Corresponding author: [zhengnan@dlpu.edu.cn](mailto:zhengnan@dlpu.edu.cn), [dongxiaoli65@163.com](mailto:dongxiaoli65@163.com)

Tel: +86 411 86323009

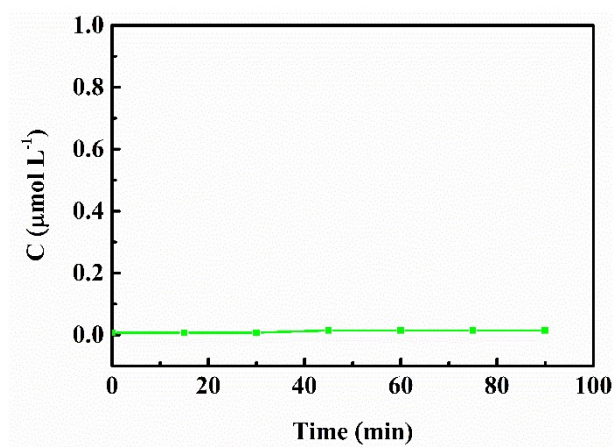

Fig. S1. The amount of N<sub>2</sub>H<sub>4</sub> produced on Bi@BOB-BMO-2.

## DFT calculations

The density functional theory (DFT) calculations were performed with the plane-wave techniques and implemented in the Vienna ab initio simulation package (VASP).<sup>[S1]</sup> The projector augmented wave (PAW) approach was employed to describe the ionelectron interaction.<sup>[S2]</sup> The generalized gradient approximation (GGA) in the form of the Perdew-Burke-Ernzerhof (PBE) was employed to describe the electron exchange and correlation energy.<sup>[S3]</sup> A 520 eV cutoff was adopted for all computations. DFT-D3 method with Beck-Jonson damping was adopted to accurately account for the weak interactions.<sup>[S4]</sup> A Monkhorst-Pack k-point mesh of  $6\times 6\times 3$  was used for BiOBr unit cell,  $4\times 4\times 1$  for BiOBr(001)-c(2x2), Bi<sub>2</sub>MoO<sub>6</sub>(001)-p(1x1) and BiOBr(001)/Bi<sub>2</sub>MoO<sub>6</sub>(001) heterojunction surface models. For surface models, a vacuum space with 15 Å was inserted in the z direction to prevent the artificial interaction between periodically repeated images. The adsorption energy ( $E_{\text{ads}}$ ) of N<sub>2</sub> molecules was defined as  $E_{\text{ads}} = E_{\text{tot}} - E_{\text{slab}} - E_{\text{N}_2}$ , in which  $E_{\text{tot}}$ ,  $E_{\text{slab}}$  and  $E_{\text{N}_2}$  stand for the total energy of the complex of the catalysts and N<sub>2</sub>, the catalysts and isolated N<sub>2</sub> molecule, respectively.

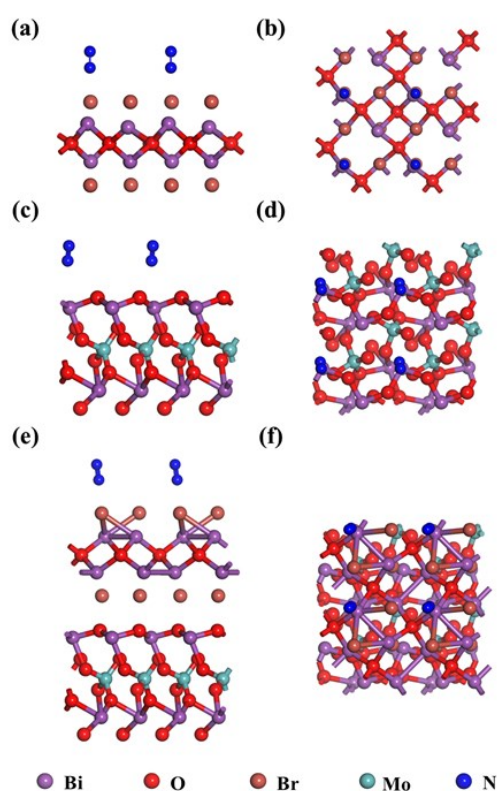

Fig. S2. Schematic illustration of optimized adsorption geometries of N<sub>2</sub> on the (001) surface of (a,b) BOB with OV, (c,d) BMO and (e,f) Bi@BOB-BMO ((a,c,e) side and (b,d,f) top views).

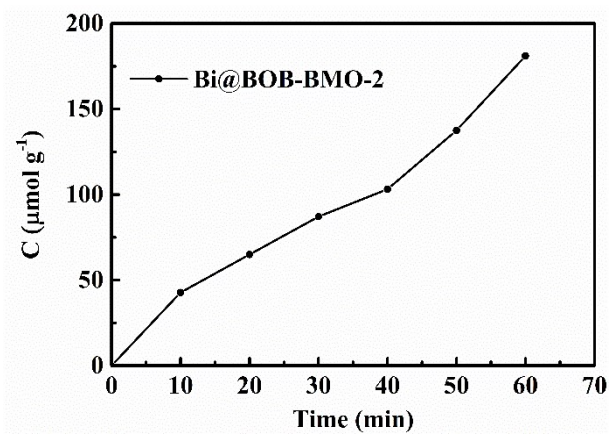

Fig. S3. O<sub>2</sub> generation along with photocatalytic nitrogen fixation of Bi@BOB-BMO-2.

Table S1. Photocatalytic nitrogen fixation over different photocatalysts under various reaction conditions.

| Photocatalyst                                                 | Scavenger                       | Light source                              | Ammonia detection method    | NH <sub>3</sub> rate                        | Ref.      |
|---------------------------------------------------------------|---------------------------------|-------------------------------------------|-----------------------------|---------------------------------------------|-----------|
| Single-Unit-Cell Bi <sub>3</sub> O <sub>4</sub> Br Nanosheets | No                              | 300 W Xe lamp full spectrum               | ion exchange chromatography | 48.3 μmol g <sup>-1</sup> h <sup>-1</sup>   | [S5]      |
| Ultrathin TiO <sub>2</sub> nanosheets                         | No                              | 300 W Xe lamp 200-800 nm                  | ion exchange chromatography | 78.9 μmol g <sup>-1</sup> h <sup>-1</sup>   | [S6]      |
| W <sub>18</sub> O <sub>49</sub> by Mo doping                  | Na <sub>2</sub> SO <sub>3</sub> | 300W Xe lamp full spectrum                | ion exchange chromatography | 176.2 μmol g <sup>-1</sup> h <sup>-1</sup>  | [S7]      |
| Ru/RuO <sub>2</sub> /g-C <sub>3</sub> N <sub>4</sub>          | Methanol                        | 300W Xe lamp full spectrum                | ion exchange chromatography | 13.3 μmol g <sup>-1</sup> h <sup>-1</sup>   | [S8]      |
| Ultrathin BiOBr nanosheets                                    | No                              | 300 W Xe lamp, full spectrum              | Nessler's reagent           | 54.70 μmol g <sup>-1</sup> h <sup>-1</sup>  | [S9]      |
| BiOBr with oxygen vacancies                                   | No                              | 300 W Xe lamp, λ >420 nm                  | Nessler's reagent           | 104.2 μmol g <sup>-1</sup> h <sup>-1</sup>  | [S10]     |
| Fe doped BiOBr nanosheets                                     | No                              | 300 W Xe lamp with a 420 nm cutoff filter | Nessler's reagent           | 382.68 μmol g <sup>-1</sup> h <sup>-1</sup> | [S11]     |
| Bi deposited InVO <sub>4</sub> nanosheets                     | No                              | 300 W Xe lamp, full spectrum              | Nessler's reagent           | 626 μmol g <sup>-1</sup> h <sup>-1</sup>    | [S12]     |
| Fe-mediated Bi <sub>2</sub> MoO <sub>6</sub>                  | No                              | 300 W Xe lamp, λ >400 nm                  | Nessler's reagent           | 106.5 μmol g <sup>-1</sup> h <sup>-1</sup>  | [S13]     |
| Bi <sub>2</sub> MoO <sub>6</sub> /BiOBr heterojunctions       | No                              | 300 W Xe lamp, full spectrum              | Nessler's reagent           | 81.0 μmol g <sup>-1</sup> h <sup>-1</sup>   | [S14]     |
| Bi@BiOBr-Bi <sub>2</sub> MoO <sub>6</sub> heterojunction      | No                              | 300 W Xe lamp, full spectrum              | ion exchange chromatography | 167.15 μmol g <sup>-1</sup> h <sup>-1</sup> | This work |

Table S1 displays the photocatalytic nitrogen fixation performance of our Bi@BiOBr-Bi<sub>2</sub>MoO<sub>6</sub> ternary heterojunction relative to other similar photocatalysts under various reaction conditions. As shown in columns 5 of Table S1, among the numerous bismuth photocatalysts, the nitrogen fixation level of our photocatalyst fall within the mid-range of all other photocatalysts.

## References

- S1. G. Kresse, J. Furthmüller, *Phys. Rev. B*, 1996, **54**, 11169–11186.
- S2. G. Kresse, D. Joubert, *Phys. Rev. B*, 1999, **59**, 1758–1775.
- S3. J. Perdew, K. Burke, M. Ernzerhof, *Phys. Rev. Lett.*, 1996, **77**, 3865–3868.
- S4. S. Grimme, S. Ehrlich, L. Goerigk, *J. Chem. Phys.*, 2011, **32**, 1456–1465.
- S5. J. Di, J. Xia, M. F. Chisholm, J. Zhong, C. Chen, X. Cao, F. Dong, Z. Chi, H. Chen, Y. X. Weng, J. Xiong, S. Z. Yang, H. Li, Z. Liu and S. Dai, *Adv. Mater.*, 2019, **31**, 1807576–1807583.
- S6. Y. Zhao, Y. Zhao, R. Shi, B. Wang, G. I. N. Waterhouse, L. Z. Wu, C. H. Tung and T. Zhang, *Adv. Mater.*, 2019, **31**, 1806482–1806490.
- S7. N. Zhang, A. Jalil, D. Wu, S. Chen, Y. Liu, C. Gao, W. Ye, Z. Qi, H. Ju, C. Wang, X. Wu, L. Song, J. Zhu and Y. Xiong, *J. Am. Chem. Soc.*, 2018, **140**, 9434–9443.
- S8. H. Wang, X. Li, Q. Ruan and J. Tang, *Nanoscale*, 2020, **12**, 12329–12335.
- S9. X. Xue, R. Chen, H. Chen, Y. Hu, Q. Ding, Z. Liu, L. Ma, G. Zhu, W. Zhang, Q. Yu, J. Liu, J. Ma and Z. Jin, *Nano. Lett.*, 2018, **18**, 7372–7377.
- S10. H. Li, J. Shang, Z. Ai and L. Zhang, *J. Am. Chem. Soc.*, 2015, **137**, 6393–6399.
- S11. Y. Liu, Z. Hu and J. C. Yu, *Chem. Mater.*, 2020, **32**, 1488–1494.
- S12. J. Wang, C. Hua, X. Dong, Y. Wang and N. Zheng, *Sustain. Energy Fuels*, 2020, **4**, 1855–1862.
- S13. Q. Meng, C. Lv, J. Sun, W. Hong, W. Xing, L. Qiang, G. Chen and X. Jin, *Appl. Catal., B*, 2019, **256**, 117781.
- S14. X. Xue, R. Chen, C. Yan, Y. Hu, W. Zhang, S. Yang, L. Ma, G. Zhu and Z. Jin, *Nanoscale*, 2019, **11**, 10439–10445.
